# Supplementary material
Source: publisher figshare collection journal article supplement (https://acs.figshare.com/ndownloader/files/4560361)
Supplement: Supplementary file 1 [file 4560361]

# Supporting Information

## **Sensing proteins with luminescent silica nanoparticles.**

Loredana Latterini\* and Matteo Amelia<sup>#</sup>.

Contribution from CEMIN-Centro di Eccellenza Materiali Innovativi Nanostrutturati, Dipartimento di Chimica, Università di Perugia, Via Elce di Sotto, 8, 06123 Perugia, Italy

Figures

5

\* Corresponding author. Phone: +39-75-5855636; Fax: +39-75-5855598.

E-mail: [loredana@unipg.it](mailto:loredana@unipg.it) (L. Latterini)

<sup>#</sup> Present address: Dipartimento di Chimica “G. Ciamician”, Università di Bologna, Via Selmi 2, 40126 Bologna (Italy).

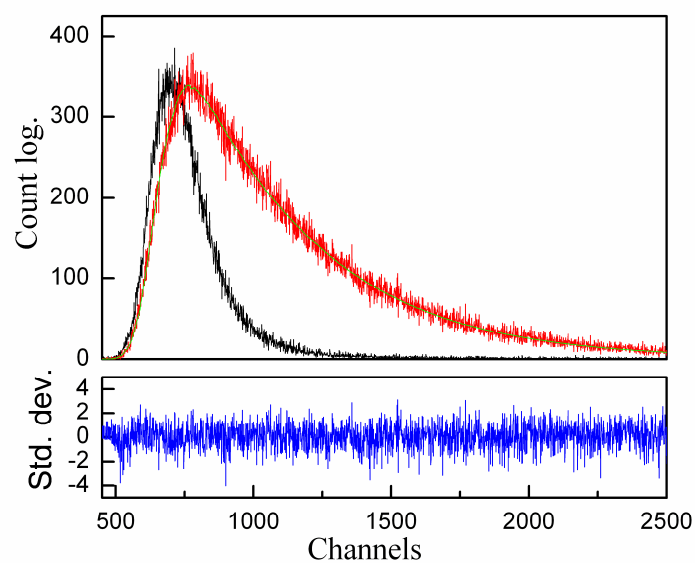

**Figure S1.** Fluorescence decay curve of perylene loaded silica nanoparticles (red) and source profile (black). The best-fitting curve (green) and residues (blue) are also reported.

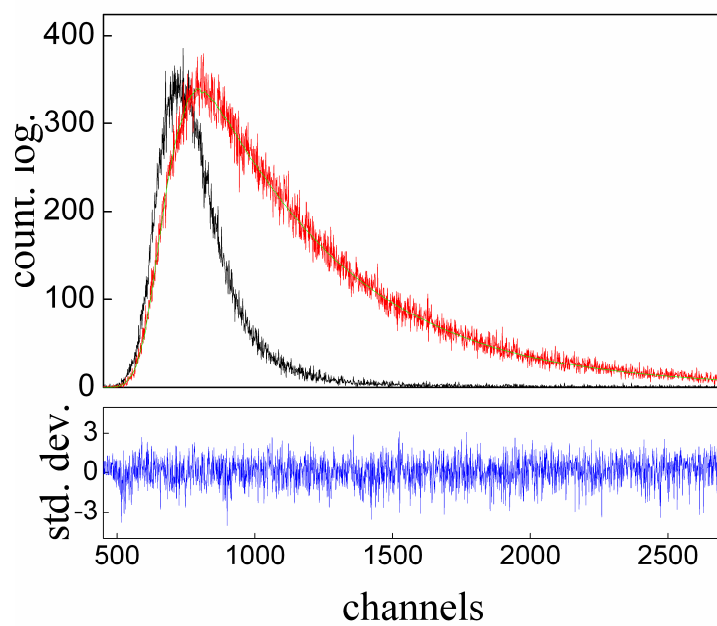

**Figure S2.** Fluorescence decay curve of 1,6 diphenyl-1,3,6-hexatriene loaded silica nanoparticles (red) and source profile (black). The best-fitting curve (green) and residues (blue) are also reported.

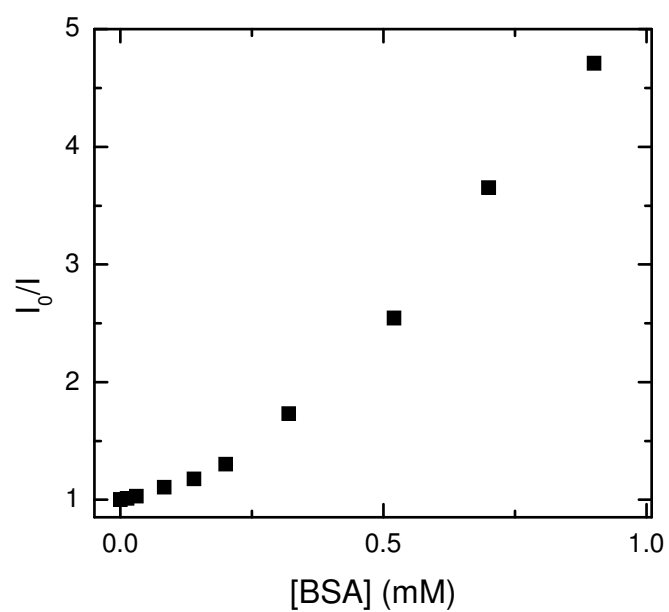

**Figure S3.** Stern-Volmer plot of perylene loaded silica nanoparticles fluorescence in the presence of increasing BSA concentrations (pH=6)

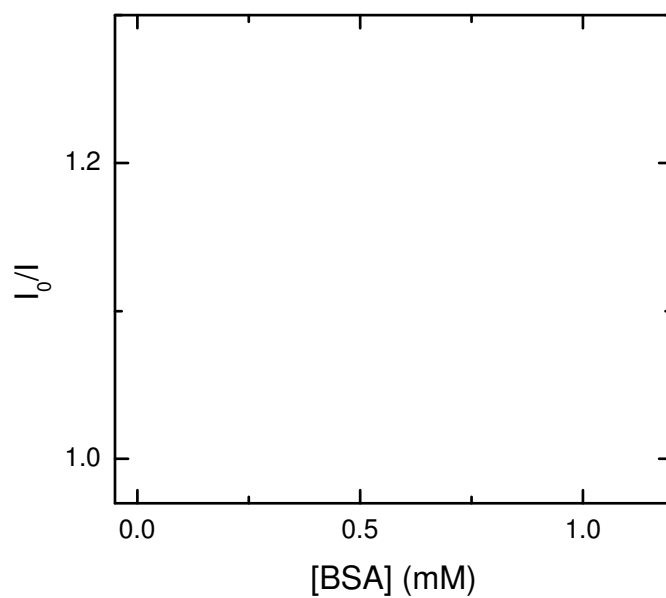

**Figure S4.** Stern-Volmer plot of perylene loaded silica nanoparticles fluorescence in the presence of increasing BSA concentrations (pH=3)

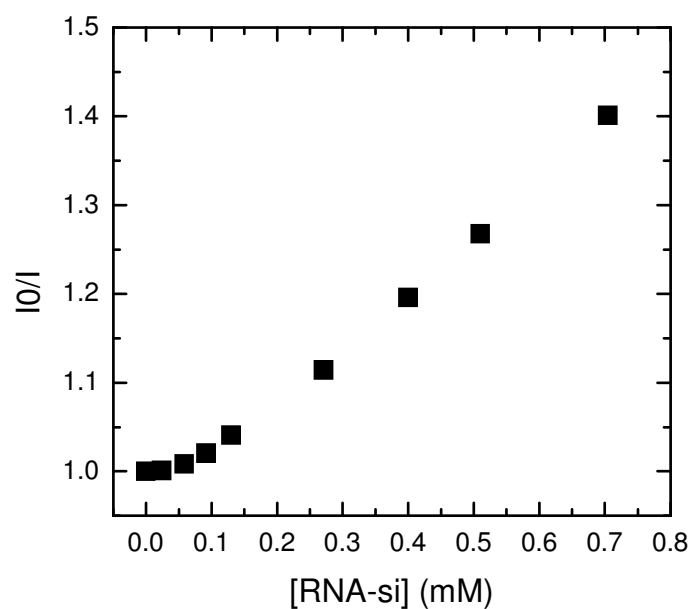

**Figure S5.** Stern-Volmer plot of perylene loaded silica nanoparticles fluorescence in the presence of increasing RNA-si concentrations.

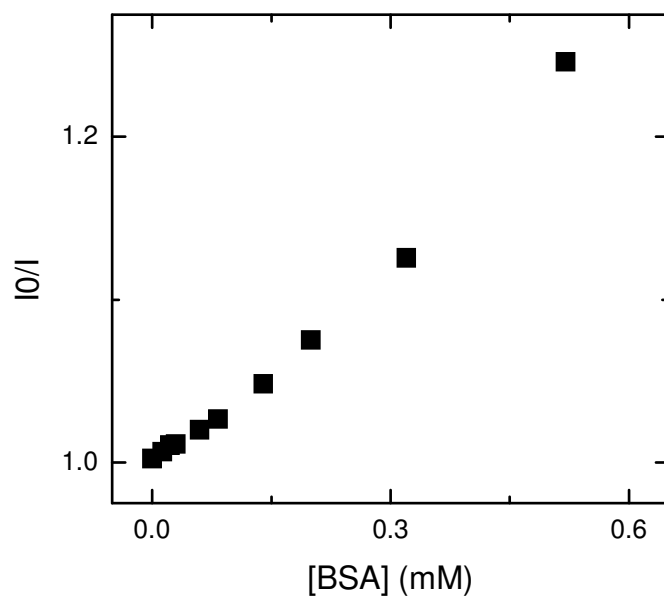

**Figure S6.** Stern-Volmer plot of DPH loaded silica nanoparticles fluorescence in the presence of increasing BSA concentrations (pH=6)

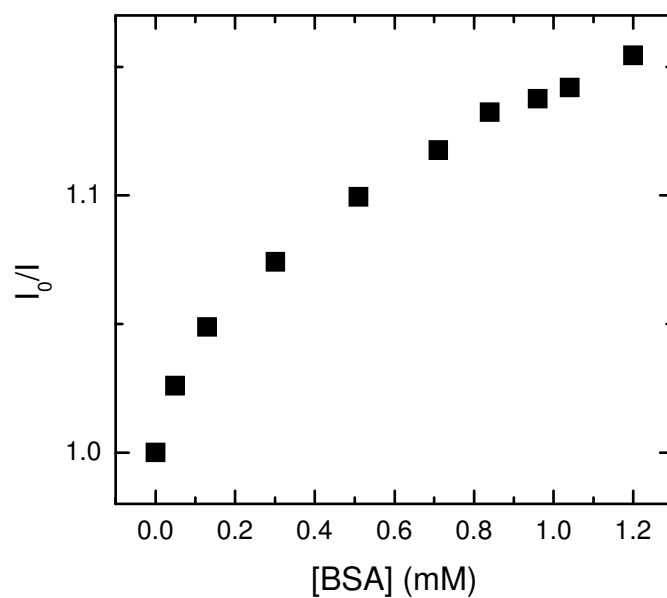

**Figure S7.** Stern-Volmer plot of DPH loaded silica nanoparticles fluorescence in the presence of increasing BSA concentrations (pH=3)

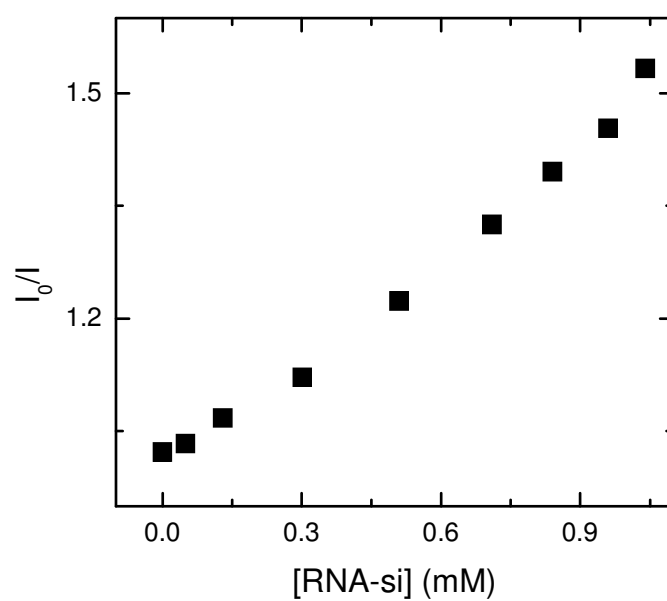

**Figure S8.** Stern-Volmer plot of DPH loaded silica nanoparticles fluorescence in the presence of increasing RNA-si concentrations.
